# Supplementary material for: MicroRNAs in Parkinson’s disease: a systematic review and diagnostic accuracy meta-analysis
Source: PubMed Central journal article supplement (PMC10539377; doi:10.1038/s41598-023-43096-9), 2023-09-28
Supplement: 41598_2023_43096_MOESM1_ESM.pdf [file 41598_2023_43096_MOESM1_ESM.pdf]

# MicroRNAs in Parkinson's disease: A systematic review and diagnostic accuracy meta-analysis

Diane Guévremont, Joyeeta Roy, Nicholas J. Cutfield, Joanna M. Williams.

**Supplementary Table S1. Characteristics of studies included in the systematic review and meta-analysis on microRNAs in Parkinson's disease patients compared to controls.** BBC – brain bank criteria; CT – controls; DA – dopamine; IRDB – idiopathic REM sleep behaviour disorder, LEDD – levodopa equivalent daily dose; MDS – Movement Disorders Society Clinical Diagnostic Criteria, NP – neuropathology; PD – Parkinson's disease; STN-DBS – subthalamic nucleus deep brain stimulation; UKPDSBBC = UK Parkinson's Disease Brain Bank Criteria; † newly diagnosed PD patients; \*median value; \*\*mean  $\pm$  SEM.

| Study               | Ref | Country | # PD               | # CT | # Men (PD) | # Men (CT) | Age PD (Years $\pm$ SD) | Age HC (Years $\pm$ SD) | Disease Duration (Y $\pm$ SD) | H&Y Score (score $\pm$ SD or range) | Diagnostic Criteria for PD | PD Type    | PD Medication Status (n=)             | PD Medication Type and Dose (mg/day) or LEDD (mg/day $\pm$ SD)   |
|---------------------|-----|---------|--------------------|------|------------|------------|-------------------------|-------------------------|-------------------------------|-------------------------------------|----------------------------|------------|---------------------------------------|------------------------------------------------------------------|
| Alieva 2015         | 124 | Russia  | 38                 | 24   | 19         | 12         | 55.6 $\pm$ 7.6          | -                       | -                             | 1–2                                 | UKPDSBBC                   | Mixed      | Treated (18); Untreated (20)          | Pramipexole 1.5; Piribedil 150; Levodopa 150-200; Amantadine 300 |
| Alvarez-Erviti 2013 | 94  | Spain   | 6                  | 5    | -          | -          | -                       | -                       | -                             | -                                   | Queen Square BBC           | Idiopathic | -                                     | -                                                                |
| Baghi 2020          | 115 | Iran    | 33                 | 25   | 23         | 16         | 62.9 $\pm$ 11.4         | 60.3 $\pm$ 10.1         | 5.8 $\pm$ 4.9                 | 1–4                                 | -                          | -          | -                                     | -                                                                |
| Baghi 2021          | 116 | Iran    | 20                 | 20   | 12         | 14         | 61.7 $\pm$ 12.6         | 58.45 $\pm$ 9.4         | 7.39 $\pm$ 5.71               | 2.3 $\pm$ 0.95 (1-4)                | -                          | -          | -                                     | -                                                                |
| Bai 2017            | 58  | China   | 80                 | 80   | 48         | 48         | 64.0 $\pm$ 5.8          | 63.3 $\pm$ 5.4          | 4.4 $\pm$ 4.4                 | 1–3                                 | UKPDSBBC                   | Idiopathic | Levodopa Treated (61); Untreated (19) | 312.4 $\pm$ 319.2                                                |
| Barbagallo 2020     | 29  | Italy   | 30                 | 30   | 24         | 10         | 69.6 $\pm$ 8.0          | 67.9 $\pm$ 8.2          | 6.9 $\pm$ 3.6                 | 2.6 $\pm$ 0.9                       | Gelb                       | -          | Treated                               | -                                                                |
| Behbahanipour 2019  | 117 | Iran    | 36                 | 16   | 25         | 11         | 61.3 $\pm$ 11.4         | 62.5 $\pm$ 12.4         | 5.8 $\pm$ 5.6                 | 1–4                                 | UKPDSBBC                   | -          | -                                     | -                                                                |
|                     |     |         | Early stage (28)   | -    | 20         | -          | 60.9 $\pm$ 10.6         | -                       | 4.9 $\pm$ 4.8                 | 1–2                                 |                            |            |                                       |                                                                  |
|                     |     |         | Advanced stage (8) | -    | 5          | -          | 62.8 $\pm$ 14.6         | -                       | 9.3 $\pm$ 7.4                 | 3–4                                 |                            |            |                                       |                                                                  |

|                   |     |         |                                      |     |    |    |                 |                 |                  |                  |                        |                   |           |                   |
|-------------------|-----|---------|--------------------------------------|-----|----|----|-----------------|-----------------|------------------|------------------|------------------------|-------------------|-----------|-------------------|
| Bissonnette 2018  | 85  | USA     | 10                                   | 10  | -  | -  | -               | -               | -                | -                | UKPDSBBC               | -                 | -         | -                 |
| Botta-Orfila 2014 | 30  | Spain   | Pilot study (20)                     | 10  | 10 | 5  | 61.1 ± 10.1     | 65 ± 9.1        | -                | -                | UKPDSBBC               | Idiopathic, LRRK2 | -         | -                 |
|                   |     |         | Validation 1 (20)                    | 20  | 10 | 10 | 69.75 ± 1       | 71.3 ± 8.4      | -                | -                |                        | Idiopathic, LRRK2 |           |                   |
|                   |     |         | Validation 2 (65)                    | 65  | 29 | 29 | 68.1 ± 10       | 66.3 ± 11.4     | 9.6              | 1-5              |                        | Idiopathic        |           |                   |
| Briggs 2015       | 86  | USA     | 8                                    | 8   | 5  | 5  | -               | -               | -                | -                | UKPDSBBC               | Idiopathic        | -         | -                 |
| Burgos 2014       | 87  | USA     | CSF (65)                             | 70  | -  | -  | 80.0 ± 5.1      | 82.1 ± 10       | 12.6 ± 7.9       | -                | -                      | -                 | -         | -                 |
|                   |     |         | Serum (60)                           | 72  | -  | -  | -               | -               | -                | -                | -                      | -                 | -         | -                 |
| Caggiu 2018       | 103 | Italy   | 37                                   | 43  | 7  | 18 | 71.3 ± 9.6      | 60.0 ± 13.1     | 8.3 ± 4.3        | 3.3 ± 1.2        | Gelb                   | -                 | Treated   | 458.3 ± 227.7     |
| Caldi Gomes 2022  | 111 | Germany | Discovery (13)                       | 10  | 8  | 4  | 78.3 ± 1.3      | 77.1 ± 3.4      | 13.4 ± 1.3       | -                | -                      | Idiopathic        | -         | -                 |
|                   |     |         | Replication (6)                      | 2   | 12 | 0  | 82.7 ± 1.7      | 74.5 ± 5.3      | 12.2 ± 1         | -                | -                      | -                 | -         | -                 |
| Cao 2017          | 31  | China   | 109                                  | 40  | 73 | 25 | 59.9 ± 13.3     | 67.9 ± 8.6      | 9.2 ± 7.4        | 1-5              | UKPDSBBC               | -                 | -         | -                 |
| Cardo 2013        | 95  | Spain   | 31                                   | 25  | 17 | 13 | 63.9 ± 11.9     | 67.6 ± 15.2     | †                | -                | UKPDSBBC               | -                 | Untreated | -                 |
| Cardo 2014        | 96  | Spain   | 8                                    | 4   | 3  | 2  | 77.4 ± 9.0      | 69.0 ± 11.7     | -                | -                | LBS and SN neuron loss | Idiopathic        | -         | -                 |
| Chen 2016         | 59  | China   | 24                                   | 61  | 14 | 34 | 58.51 ± 5.6     | 54.2 ± 12.8     | 2.4 ± 1.1        | -                | UKPDSBBC               | -                 | -         | -                 |
| Chen 2017         | 45  | China   | 169                                  | 170 | 81 | 91 | 61.9 ± 5.1      | 61.6 ± 3.3      | 5.8 ± 4.2        | 2.0 ± 0.8        | UKPDSBBC               | Sporadic          | Treated   | 500.7 ± 350.5     |
| Chen 2018         | 60  | China   | 25                                   | 25  | 16 | 16 | 65.0 ± 8.7      | -               | †                | -                | UKPDSBBC               | -                 | Untreated | -                 |
| Chen 2020         | 46  | China   | 30                                   | 30  | 20 | 16 | 63.2 ± 10.2     | 59.6 ± 12.8     | -                | 2                | MDS-UPDRS              | -                 | -         | -                 |
| Chen 2021         | 32  | China   | 46                                   | 45  | 13 | 18 | 63.09 (60.2-66) | 61.54 (60-63.1) | 5.72 (4.43-7.01) | 2.86 (2.57-3.15) | MDS-UPDRS              | -                 | -         | -                 |
| Chis 2021         | 132 | Romania | Discovery (10)                       | 10  | 6  | 6  | 65.9 (6.1)      | 68.1 (6.4)      | -                | 1.9 (0.7)        | MDS                    | -                 | treated   | -                 |
|                   |     |         | Validation (66)                      | 29  | 35 | 14 | 68 (9.1)        | 63.5 (9.1)      | -                | 2.5 (0.8)        | MDS                    | -                 | treated   | -                 |
|                   |     |         | Validation (10 untreated/10 treated) | -   | 7  | -  | 67.2 (6.6)      | -               | -                | -                | -                      | -                 | -         | Untreated/Treated |
| Chiu 2019         | 126 | Taiwan  | 50                                   | 50  | 24 | 23 | 66.4 ± 1.0      | 63.7 ± 1.1      | -                | -                | Gelb                   | Sporadic          | -         | -                 |
| Cho 2013          | 88  | USA     | 15                                   | 11  | -  | -  | 80.0 ± 6.9      | 85 ± 6.6        | -                | -                | LBS and SN neuron loss | Sporadic          | -         | -                 |



|              |     |             |                  |     |    |    |                          |                          |               |                              |           |                                                         |                                |                        |
|--------------|-----|-------------|------------------|-----|----|----|--------------------------|--------------------------|---------------|------------------------------|-----------|---------------------------------------------------------|--------------------------------|------------------------|
| Jin 2018     | 10  | China       | 46               | 46  | 23 | 25 | 60.2 ± 9.9               | 61.3 ± 9.0               | -             | 1-3                          | UKPDSBBC  | Tremor-dominant, bradykinesia, rigidity-dominant, mixed | -                              | -                      |
| Kho 2012     | 48  | USA         | Discovery (32)   | 32  | 16 | 15 | 66 ± 11 (M); 67 ± 11 (F) | 65 ± 10 (M); 62 ± 17 (F) | -             | 1.8 ± 2.3 (M); 1.5 ± 2.4 (F) | UKPDSBBC  | Idiopathic                                              | 10 non-medicated, 20 medicated | -                      |
|              |     |             | Replication (42) | 30  | 20 | 10 | 68 ± 6 (M); 72 ± 8 (F)   | 64 ± 15 (M); 59 ± 14 (F) | -             | 1.8 ± 1.8 (M); 1.6 ± 1.5 (F) |           |                                                         |                                |                        |
|              |     |             | Validation (30)  | 8   | 16 | 3  | 68 ± 10 (M); 71 ± 7 (F)  | 71 ± 3 (M); 73 ± 4 (F)   | -             | 2.1 ± 0.7 (M); 2.4 ± 0.6 (F) |           |                                                         |                                |                        |
| Kim 2007     | 89  | USA         | 3                | 5   | 3  | 5  | 70.0 ± 8.9               | 79.0 ± 12.5              | 2.6 ± 1.2     | -                            | UKPDSBBC  | -                                                       | -                              | -                      |
| Kurz 2021    | 112 | Germany     | 13               | 17  | 10 | 9  | 70.4 ± 6.9               | 64.9 ± 8.9               | -             | 2.5 ± 1.4                    | UKPDSBBC  | Idiopathic                                              | -                              | -                      |
| Li 2017      | 49  | China       | 60               | 60  | 33 | 30 | 68.3 ± 7.5               | 67.0 ± 7.6               | -             | -                            | UKPDSBBC  | Sporadic idiopathic                                     | -                              | -                      |
|              |     |             | PD-Dep (24)      |     | 16 |    | 5.22 ± 4.1               |                          | 3.08 ± 1.1    |                              |           |                                                         |                                |                        |
|              |     |             | PD-NDep (36)     |     | 17 |    | 3.83 ± 4.2               |                          | 2.19 ± 1.2    |                              |           |                                                         |                                |                        |
| Li 2020      | 50  | China       | 80               | 60  | 42 | 31 | 64.6 ± 7.5               | 64.0 ± 7.3               | 4.8 ± 3.23    | 2.2 ± 0.8                    | UKPDSBBC  | -                                                       | -                              | -                      |
| Li 2021      | 51  | China       | pPD (25)         | 21  | 13 | 10 | 68 (63 - 70)             | 64 (62 - 66)             | -             | -                            | UKPDSBBC  | -                                                       | -                              | -                      |
|              |     |             | dnPD (20)        |     | 9  |    | 1.5 (1 - 2.75)           |                          | 2 (1.13 - 2)  |                              |           |                                                         |                                |                        |
|              |     |             | aPD (24)         |     | 12 |    | 8 (7 - 9)                |                          | 2.5 (2.5 - 3) |                              |           |                                                         |                                |                        |
| Lin 2022     | 65  | China       | 92               | 64  | -  | -  | -                        | -                        | -             | -                            | UKPDSBBC  | -                                                       | -                              | -                      |
| Ma 2016      | 66  | China       | 138              | 112 | 75 | 61 | 29.4 ± 13.3              | 31.2 ± 19.2              | -             | 1-5                          | UKPDSBBC  | -                                                       | -                              | -                      |
| Manna 2021   | 38  | Italy       | 45               | 39  | 26 | 15 | 64 ± 8                   | 63.7 ± 7.5               | 5.57 ± 4.1    | 2 (1-4)                      | MDS-UPDRS | -                                                       | Treated                        | -                      |
|              |     |             | Discovery (5)    | 5   |    |    | 71 ± 5.41                | 69 ± 4.38                | -             | -                            |           |                                                         |                                |                        |
|              |     |             | Validation (40)  | 34  |    |    | 66 ± 9                   | 64 ± 8                   | -             | -                            |           |                                                         |                                |                        |
| Margis 2011  | 8   | Brazil      | Untreated (8)    | 8   | 4  | 4  | 66 ± 6.7                 | 67.0 ± 8.0               | 3.0 ± 2.6     | 1-2                          | UKPDSBBC  | -                                                       | Untreated (8)                  | -                      |
|              |     |             | Early onset (7)  |     | 4  |    | 45 ± 8.7                 | 67 ± 8                   | 7.2 ± 6.6     | 1-3                          |           |                                                         | Early-onset treated (7)        | Levodopa/<br>Carbidopa |
| Marques 2017 | 39  | Netherlands | 28               | 28  | 21 | 15 | 54.5 ± 10.4              | 62.9 ± 8                 | 3.2 ± 3.4     | 1.8 ± 0.6                    | UKPDSBBC  | Sporadic                                                | -                              | -                      |

|                      |     |                       |                        |     |     |    |             |             |             |           |          |                                |                                  |                                                     |
|----------------------|-----|-----------------------|------------------------|-----|-----|----|-------------|-------------|-------------|-----------|----------|--------------------------------|----------------------------------|-----------------------------------------------------|
| Martins 2011         | 121 | Portugal              | 19                     | 13  | 10  | 5  | 65.1 ± 4.4  | 64.4 ± 5.9  | 8.7 ± 5.1   | 2.6 ± 0.8 | UKPDSBBC | Idiopathic                     | -                                | -                                                   |
| McMillan 2017        | 127 | UK                    | 6                      | 5   | 2   | 1  | 83.0 ± 4.0  | 78 ± 4.7    | 16.2 ± 5.9  | -         | -        | -                              | Treated                          | Levodopa                                            |
| Miñones-Moyano 2011  | 99  | Spain                 | Treated (16)           | 28  | 10  | 17 | 74.6 ± 11.0 | 58.6 ± 16.0 | -           | -         | -        | Braak Stages 4-5               | Treated                          | -                                                   |
|                      |     |                       | Untreated (7)          |     | 5   |    | 68.1 ± 16.3 |             | -           | -         | -        | Braak Stages 1-3 (undiagnosed) | Untreated                        | -                                                   |
| Mo 2017              | 53  | China                 | 44                     | 42  | 26  | 24 | 56.8 ± 17.1 | 55.4 ± 12.5 | 2.2 ± 1.3   | 1-2.5     | UKPDSBBC | -                              | -                                | -                                                   |
| Nair 2016            | 90  | USA                   | 12                     | 12  | 6   | 6  | 75.6 ± 8.4  | 74.1 ± 11.6 | -           | -         | -        | -                              | Treated (10)                     | Levodopa                                            |
| Nie 2020             | 67  | China                 | 7                      | 34  | 1   | 10 | 61.9 ± 8.4  | 33.2 ± 9.6  | -           | -         | UKPDSBBC | -                              | -                                | -                                                   |
| Oliveira 2020        | 122 | Portugal              | Discovery (20)         | 20  | 10  | 10 | 71.6 ± 9.2  | 69.5 ± 8.1  | 11.9 ± 8.9  | 2.3 ± 0.6 | MDS      | Idiopathic                     | Treated                          | All patients were taking antiparkinsonic medication |
|                      |     |                       | Validation (20)        | 20  | 10  | 10 | 69.2 ± 11.3 | 65.3 ± 8.3  | 12.6 ± 9.4  | 2.6 ± 1.1 | MDS      | Idiopathic                     | Treated                          | All patients were taking antiparkinsonic medication |
| Ozdilek 2020         | 54  | Turkey                | 51                     | 20  | 31  | 12 | 64.0 ± 9.0  | 58.6 ± 7.1  | 5.7 ± 3.8   | 2.0 ± 0.7 | UKPDSBBC | -                              | Treated                          | 938.7 ± 507.6                                       |
| Patil 2019           | 91  | USA/Norway/<br>Sweden | Pilot (16)             | 8   | 8   | 4  | 65.8 ± 6.9  | 66.9 ± 8.9  | -           | 1.7 ± 0.3 | UKPDSBBC | -                              | Untreated,<br>newly<br>diagnosed | -                                                   |
|                      |     |                       | Verification (164)     | 182 | 101 | 93 | 68.3 ± 9.4  | 66.5 ± 9.5  | -           | 1.9 ± 0.6 |          |                                |                                  |                                                     |
|                      |     |                       | Validation (42)        | 22  | 21  | 12 | 68.5 ± 9.8  | 68.3 ± 7.0  | -           | -         |          |                                |                                  |                                                     |
| Perez-Soriano 2020   | 100 | Spain                 | Discovery (19)         | 40  | 12  | 28 | 64 ± 12     | 66 ± 11.5   | 5.3 ± 2.9   | 1.6 ± 0.5 | -        | -                              | Treated                          | 511 ± 278                                           |
|                      |     |                       | Validation (18)        | 20  | 8   | 10 | 64 ± 8.6    | 64.5 ± 9.6  | 5.4 ± 2.3   | 2.1 ± 0.6 | -        | -                              | Treated                          | 630 ± 320                                           |
| Qin 2019             | 68  | China                 | 20                     | 27  | 10  | 14 | 66.5 ± 9.0  | 63.7 ± 7.9  | 1.99 ± 1.01 | -         | UKPDSBBC | Sporadic                       | -                                | -                                                   |
| Ravanidis 2019; 2020 | 41  | Greece                | Initial study (99 iPD) | 101 | 55  | 23 | 67.1 ± 12.4 | 61.6 ± 10.6 | 7.3 ± 7.2   | -         | MDS      | Idiopathic                     | -                                | -                                                   |
|                      |     |                       | Validation (109 iPD)   | 92  | 57  | 33 | 64.2 ± 10.4 | 57.1 ± 12   | 5.4 ± 5.8   | -         |          |                                | -                                |                                                     |
|                      |     |                       | Pooled (208 iPd)       | 193 | 112 | 56 | -           | -           | -           | -         |          |                                | -                                |                                                     |
| Schlaudraff 2014     | 113 | Germany               | 5                      | 8   | 3   | 4  | 78.2 ± 1.3  | 69 ± 1.6    | -           | -         | Sporadic | Braak Stages 0-5               | -                                | -                                                   |
| Schwienbacher 2017   | 105 | Italy                 | L-dopa set 1 (50)      | 49  | 26  | 26 | 65.2 ± 10.4 | 65.2 ± 10.0 | 6.7 ± 5.0   | 1-3       | Gelb     | -                              | Treated Set 1                    | Levodopa                                            |
|                      |     |                       | L-dopa set 2 (50)      | 49  | 23  | 23 | 68.1 ± 8.9  | 68.6 ± 8.7  | 6.9 ± 5.3   | 1-4       |          | -                              | Treated Set 2                    |                                                     |
|                      |     |                       | Drug naive (10)        | 10  | 6   | 4  | 67.5 ± 6.9  | 67.1 ± 7.3  | 3.8 ± 3.2   | 1-2.5     |          | -                              | Untreated                        |                                                     |

|                      |     |          |                       |    |     |    |                                      |                          |                                |             |                      |                                |                     |               |
|----------------------|-----|----------|-----------------------|----|-----|----|--------------------------------------|--------------------------|--------------------------------|-------------|----------------------|--------------------------------|---------------------|---------------|
| Serafin 2015         | 106 | Italy    | l-Dopa (36)           | 36 | -   | -  | -                                    | -                        | -                              | -           | Gelb                 | -                              | Treated             | -             |
|                      |     |          | Drug naive (10)       | 10 | -   | -  | -                                    | -                        | -                              | -           |                      | -                              | -                   | Untreated     |
| Sethi 2009           | 92  | USA      | 4                     | 6  | -   | -  | 69.5 ± 1.7                           | 69.0 ± 1.8               | -                              | -           | Idiopathic           | -                              | -                   | -             |
| Sheinerman 2017      | 42  | USA      | 50                    | 50 | 35  | 24 | 66.76 ± 7.7                          | 64.1 ± 9.8               | 10 ± 5.1                       | -           | Queen Square BBC     | -                              | -                   | -             |
| Shu 2020             | 69  | China    | 82                    | 44 | 52  | 27 | 68.5 ± 7.5                           | 66.2 ± 8.6               | -                              | 2.47 ± 0.64 | UPDRS III, V and MRI | -                              | -                   | -             |
| Soreq 2013           | 56  | Israel   | 7                     | 6  | 7   | 6  | 56 ± 4.0                             | 56.5 ± 6.2               | -                              | -           | -                    | -                              | Treated and STN-DBS | -             |
| Starhof 2018         | 125 | Denmark  | 37                    | 23 | 25  | 11 | 66.3 ± 12.0                          | 41.5 ± 17.6              | 6.9 ± 3.8                      | 2*          | UKPDSBBC             | -                              | Treated             | 536.6 ± 413.1 |
| Su 2019              | 70  | China    | 28                    | 28 | -   | -  | -                                    | -                        | -                              | 1           | UKPDSBBC             | Idiopathic                     | -                   | -             |
| Sulaiman 2020        | 129 | Malaysia | EOPD (14); LOPD (14)  | 11 | 11  | 3  | EOPD (53.9 ± 1.8); LOPD (68.3 ± 1.3) | (37 ± 2.3); (54.8 ± 1.5) | < 10 years 17<br>> 10 years 11 | -           | UKPDSBBC             | Idiopathic                     | Treated (28)        | -             |
| Takahashi 2015       | 119 | Japan    | 30                    | 47 | 17  | 29 | 69.0 ± 5.9                           | 67.1 ± 10.9              | -                              | -           | -                    | -                              | -                   | -             |
| Tan 2022             | 71  | China    | 7                     | 4  | 3   | 1  | 53 ± 5                               | 46 ± 10                  | 2.5 ± 1.5 (early PD)           | 2 ± 0.7     | MDS-UPDRS            | -                              | -                   | -             |
| Tatura 2016          | 114 | Germany  | 22                    | 10 | 10  | 4  | 73.9 ± 6.9                           | 65.7 ± 10.9              | -                              | -           | NP                   | T limbic (8); neocortical (10) | -                   | -             |
| Thomas 2012          | 93  | USA      | 8                     | 8  | -   | -  | -                                    | -                        | -                              | -           | -                    | -                              | -                   | -             |
| Tolosa 2018          | 101 | Spain    | sPD (3)               | 4  | 0   | 2  | 60.0 ± 7.9                           | 53.3 ± 8.8               | -                              | -           | -                    | Sporadic                       | -                   | -             |
|                      |     |          | L2PD (3)              |    | 1   |    | 58.3 ± 12.7                          |                          | -                              | -           | -                    | LRRK2                          | -                   | -             |
| Tong 2022            | 72  | China    | 209                   | 50 | 115 | 29 | 68.2 ± 5.4                           | 65.6 ± 4.3               | -                              | -           | -                    | -                              | -                   | -             |
| Uwatoko 2019         | 120 | Japan    | 28                    | 28 | 13  | 15 | 69 ± 1.32                            | 63.2 ± 1.3               | 9.6 ± 1.0                      | -           | -                    | -                              | -                   | -             |
| Vallelunga 2014      | 107 | Italy    | 25                    | 25 | 13  | 13 | between 46 and 60                    | between 46 and 60        | < 6                            | 3.0 ± 0.0   | UKPDSBBC             | -                              | Treated             | 730.5 ± 392.8 |
| Vallelunga 2019      | 108 | Italy    | 56                    | 50 | 37  | 23 | 62.1 ± 6.9                           | 64.6 ± 12.5              | 2.2 ± 2.3                      | -           | UKPDSBBC             | -                              | -                   | -             |
| Vallelunga 2021      | 109 | Italy    | 51                    | 56 | 29  | 25 | 61 ± 7                               | 63 ± 12                  | 2 ± 2.4                        | -           | UKPDSBBC             | -                              | Treated             | 302.5 ± 82    |
| Villar-Menéndez 2014 | 102 | Spain    | Braak Stages 1-2 (6)  | 26 | 4   | 17 | 78.8 ± 12.1                          | 56.9 ± 12.7              | -                              | -           | NP                   | Braak Stages 1-2               | -                   | -             |
|                      |     |          | Braak Stages 3-4 (13) |    | 7   |    | 72.3 ± 10.2                          |                          | -                              | -           |                      | Braak Stages 3-4               | -                   | -             |
|                      |     |          | Braak Stage 5 (6)     |    | 4   |    | 79.7 ± 6.2                           |                          | -                              | -           |                      | Braak Stage 5                  | -                   | -             |

|              |     |               |                          |     |                        |     |                                  |              |           |                                                     |                                        |                        |                                                                                  |                                                                                                                     |
|--------------|-----|---------------|--------------------------|-----|------------------------|-----|----------------------------------|--------------|-----------|-----------------------------------------------------|----------------------------------------|------------------------|----------------------------------------------------------------------------------|---------------------------------------------------------------------------------------------------------------------|
| Wake 2016    | 57  | USA           | 29                       | 36  | 29                     | 33  | 77.6 ± 7.8                       | 68.6 ± 14.3  | -         | -                                                   | -                                      | -                      | -                                                                                | -                                                                                                                   |
| Wang 2020    | 73  | China         | 120                      | 120 | 64                     | 54  | 70.5 ± 8.3                       | 71.2 ± 10.8  | -         | -                                                   | Parkinson's Disease Society Brain Bank | -                      | -                                                                                | -                                                                                                                   |
| Wu 2020      | 43  | China         | 85                       | 50  | 41                     | 27  | 63.5 ± 7.4                       | 61.2 ± 5.9   | -         | I 24 (28.24) -<br>II 33 (38.82) -<br>III 28 (32.94) | MDS-ES-<br>EFNS                        | -                      | Treated (85)<br>Levodopa                                                         | start 250mg, 2-4 times/d. then<br>Up to 125-750mg every 3-7 days,<br>4-6 times/d, for 12 weeks of                   |
| Xing 2020    | 74  | China         | 15                       | 10  | 9                      | 5   | 70.1 ± 7.1                       | 70.6 ± 7.6   | 5.9 ± 5.1 | 3.2 ± 0.8                                           | -                                      | -                      | -                                                                                | -                                                                                                                   |
| Yan 2020     | 75  | China         | 23                       | 24  | 10                     | 12  | 59.3 ± 8.8                       | 62.8 ± 5.7   | 1         | 2.1 ± 0.8                                           | UKPDSBBC                               | -                      | All Untreated                                                                    | patients did not take anti-PD drugs                                                                                 |
| Yang 2018    | 76  | China         | 30                       | 30  | 11                     | -   | 68.6 ± 5.5                       | -            | -         | -                                                   | MDS                                    | -                      | -                                                                                | -                                                                                                                   |
| Yang 2019 A  | 77  | China         | 319                      | 273 | 176                    | 147 | 67.6 ± 9.6**                     | 68.3 ± 9.6** | -         | -                                                   | MDS                                    | Idiopathic             | Untreated (80);<br>Treated (91);<br>Treated (levodopa+<br>DA agonists - 85)      | -                                                                                                                   |
| Yang 2019 B  | 78  | China         | 269                      | 222 | 157                    | 130 | 66.1 ± 0.6                       | 66.2 ± 0.6   | -         | 1-3                                                 | MDS                                    | Sporadic               | Treated -<br>dopamine<br>agonist (13);<br>levodopa<br>(34);<br>Untreated<br>(46) | -                                                                                                                   |
| Yang 2021    | 79  | China         | 78                       | 78  | 55                     | 48  | 65.9 ± 5.6                       | 64.6 ± 5.2   | -         | -                                                   | MDS                                    | Incipient              | Treated                                                                          | -                                                                                                                   |
| Yao 2018     | 80  | China         | 52                       | 48  | 28                     | 26  | 65.6 ± 10.5                      | 61.2 ± 9.0   | 5.3 ± 1.6 | -                                                   | UKPDSBBC                               | -                      | Treated                                                                          | Levodopa/carbidopa (52);<br>Entacapone (20); Selegiline (10);<br>Ropinirole (9); Pramipexole (5);<br>Amantadine (4) |
| Yilmaz 2016  | 123 | Turkey        | 102                      | 102 | 65                     | 44  | 67.1 ± 1.1                       | 62.7 ± 0.9   | -         | -                                                   | -                                      | -                      | Treated                                                                          | -                                                                                                                   |
| Yousefi 2022 | 118 | Iran          | 38                       | 20  | 21                     | 10  | 64.4 ± 11                        | 59.4 ± 8.2   | 5 ± 4.5   | -                                                   | UKPDSBBC                               | -                      | -                                                                                | -                                                                                                                   |
| Zago 2022    | 110 | Italy/Germany | dnPD (61)                | 77  | 37                     | 41  | 66 ± 8.2                         | 66.5 ± 8     | -         | -                                                   | -                                      | sporadic<br>idiopathic | Untreated                                                                        | -                                                                                                                   |
|              |     |               | dnPD (144);<br>adPD (12) | 35  | dnPD (74);<br>adPD (9) | 16  | dnPD (65 ± 12);<br>adPD (68 ± 6) | 75.5 ± 8.5   | -         | -                                                   | UKPDSBBC                               |                        | Untreated (dnPD);<br>Treated (adPD)                                              | -                                                                                                                   |
| Zhang 2017   | 44  | China         | 46                       | 49  | 22                     | 22  | 63.1 ± 1.5                       | 60.4 ± 1.2   | -         | 1-5                                                 | UKPDSBBC                               | Sporadic               | -                                                                                | -                                                                                                                   |
| Zhang 2020   | 81  | China         | 148                      | 126 | 86                     | 74  | 71.4 ± 3.6                       | 65.5 ± 3.4   | -         | 1-5                                                 | UKPDSBBC                               | -                      | -                                                                                | -                                                                                                                   |





**Supplementary Table S2. MicroRNA expressions reported to be significantly changed between Parkinson's disease patients and controls in the literature.** <sup>a</sup>*de-novo* Parkinson's disease patients; <sup>b</sup> early-onset Parkinson's disease patients on dopaminergic therapy; \*\*upward trend only, no statistical significance. DA – dopamine; HC – healthy controls; iPSC – induced pluripotent stem cells; PD – Parkinson's disease; PBLs – peripheral blood lymphocytes; PBMCs – peripheral blood mononuclear cells; SN – substantia nigra; CSF – cerebrospinal fluid; NGS – next generation sequencing; RNase – ribonuclease; RT-qPCR – quantitative reverse transcription polymerase chain reaction; TLDA – TaqMan Low-Density Array.

| Study               | Reference | Country | sample size | # PD | # HC | Sample               | Method of MiRNA Detection    | Normalizer         | Up                                                                      | Down                               | AUC                                                                                                              |
|---------------------|-----------|---------|-------------|------|------|----------------------|------------------------------|--------------------|-------------------------------------------------------------------------|------------------------------------|------------------------------------------------------------------------------------------------------------------|
| Alieva 2015         | 124       | Russia  | 62          | 38   | 24   | PBLs                 | RT-qPCR (TaqMan)             | U6, U44, U47 snRNA | miR-7-5p, miR-9-3p, miR-9-5p, miR-129-5p, miR-132-3p                    | -                                  | -                                                                                                                |
| Alvarez-Erviti 2013 | 94        | Spain   | 11          | 6    | 5    | Brain (SN, amygdala) | RT-qPCR (TaqMan)             | -                  | miR-21-3p, miR-26b-5p, miR-106a-3p, miR-224-5p, miR-301b-3p, miR-373-5p | -                                  | -                                                                                                                |
| Baghi 2020          | 115       | Iran    | 58          | 33   | 25   | PBMCs                | RT-qPCR (SYBR Green ExiLENT) | U6 snRNA           | miR-376a-3p                                                             | -                                  | miR-376a-3p (0.80)                                                                                               |
| Baghi 2021          | 116       | Iran    | 40          | 20   | 20   | PBMCs                | RT-qPCR (SYBR Green)         | U6 snRNA           | miR-193b                                                                | -                                  | miR-193b (0.79)                                                                                                  |
| Bai 2017            | 58        | China   | 160         | 80   | 80   | Serum                | RT-qPCR (miRcute)            | cel-miR-39         | -                                                                       | miR-29a-3p, miR-29b-3p, miR-29c-3p | -                                                                                                                |
| Barbagallo 2020     | 29        | Italy   | 60          | 30   | 30   | Serum                | RT-qPCR (TaqMan)             | miR-17-5p          | let-7d-5p, miR-22-5p, miR-23a-3p, miR-24-3p, miR-142-3p, miR-222-3p     | -                                  | let-7d (0.75), miR-22* (0.85), miR-23a (0.87), miR-24 (0.78), miR-142-3p (0.78), miR-222 (0.82), combined (0.94) |
| Behbahanipour 2019  | 117       | Iran    | 52          | 36   | 16   | PBMCs                | RT-qPCR (SYBR Green)         | miR-191-5p         | miR-17-5p, miR-885-5p                                                   | miR-361-5p                         | miR-17-5p (0.76), miR-885-5p (0.81), miR-361-5p (0.76);                                                          |

| Study                    | Reference  | Country | sample size | # PD | # HC | Sample     | Method of MiRNA Detection  | Normalizer               | Up                                                                                                                                              | Down                                                                                                                                                            | AUC                                                   |
|--------------------------|------------|---------|-------------|------|------|------------|----------------------------|--------------------------|-------------------------------------------------------------------------------------------------------------------------------------------------|-----------------------------------------------------------------------------------------------------------------------------------------------------------------|-------------------------------------------------------|
|                          |            |         |             |      |      |            |                            |                          |                                                                                                                                                 |                                                                                                                                                                 | combined (0.99)                                       |
| <b>Bissonnette 2018</b>  | <b>85</b>  | USA     | 20          | 10   | 10   | CSF        | NGS (HTG EdgeSeq)          | -                        | miR-578, miR-766-5p, miR-889-3p, miR-4736                                                                                                       | -                                                                                                                                                               | -                                                     |
| <b>Botta-Orfila 2014</b> | <b>30</b>  | Spain   | 130         | 65   | 65   | Serum      | TLDA, RT-qPCR (TaqMan)     | miR-17-5p, miR-106       | -                                                                                                                                               | miR-19a-3p, miR-19b-3p, miR-29a-3p, miR-29c-3p                                                                                                                  | miR-19a-3p, miR-19b-3p, miR-29a-3p, miR-29c-3p (0.77) |
| <b>Briggs 2015</b>       | <b>86</b>  | USA     | 16          | 8    | 8    | Brain (SN) | TLDA                       | Global mean              | let-7b-5p, miR-26a-5p, miR-28-5p, miR-92a-3p, miR-95-3p, miR-106a-5p, miR-135a-5p, miR-145-5p, miR-148a-3p, miR-223-3p, miR-335-3p, miR-374a-5p | miR-532-5p, miR-744-5p                                                                                                                                          | -                                                     |
| <b>Burgos 2014</b>       | <b>87</b>  | USA     | 112         | 50   | 62   | Serum      | NGS (Illumina HiSeq2000)   | DESeq2                   | miR-30a-3p, miR-30e-3p, miR-338-3p                                                                                                              | miR-16-2-3p, miR-1294                                                                                                                                           | -                                                     |
|                          |            |         | 122         | 57   | 65   | CSF        |                            |                          | miR-19a-3p, miR-19b-3p, let-7g-3p                                                                                                               | miR-10a-5p, miR-127-3p, miR-128, miR-132-5p, miR-136-3p, miR-212-3p, miR-370, miR-409-3p, miR-431-3p, miR-433-3p, miR-485-5p, miR-873-3p, miR-1224-5p, miR-4448 | -                                                     |
| <b>Caggiu 2018</b>       | <b>103</b> | Italy   | 80          | 37   | 43   | PBMCs      | RT-qPCR (Qiagen)           | U6 snRNA, SNORD68 snoRNA | miR-155-5p                                                                                                                                      | miR-146a-5p                                                                                                                                                     | -                                                     |
| <b>Caldi Gomes 2022</b>  | <b>111</b> | Germany | 31          | 19   | 12   | Midbrain   | NGS (Illumina's HiSeq4000) | DESeq2                   | miR-539-3p, miR-376a-5p, miR-218-5p, miR-369-3p                                                                                                 | -                                                                                                                                                               | -                                                     |

| Study      | Reference | Country | sample size | # PD | # HC | Sample               | Method of MiRNA Detection                                               | Normalizer                         | Up                    | Down                                                                                                                                                                 | AUC                                                                                                                                                                                                        |
|------------|-----------|---------|-------------|------|------|----------------------|-------------------------------------------------------------------------|------------------------------------|-----------------------|----------------------------------------------------------------------------------------------------------------------------------------------------------------------|------------------------------------------------------------------------------------------------------------------------------------------------------------------------------------------------------------|
| Cao 2017   | 31        | China   | 149         | 109  | 40   | Serum                | RT-qPCR (SYBR, Takara)                                                  | let-7d, let-7g, let-7i, cel-miR-39 | miR-24-3p, miR-195-5p | miR-19b-3p                                                                                                                                                           | miR-19b (0.75), miR-24 (0.91), miR-195 (0.70); combined (0.95)                                                                                                                                             |
| Cardo 2013 | 95        | Spain   | 56          | 31   | 25   | Plasma               | TLDA, RT-qPCR (TaqMan)                                                  | miR-191                            | miR-331-5p            | -                                                                                                                                                                    | -                                                                                                                                                                                                          |
| Cardo 2014 | 96        | Spain   | 12          | 8    | 4    | Brain (SN, striatum) | TLDA, RT-qPCR (TaqMan)                                                  | U6, U44 snRNA                      | miR-548d-3p           | miR-135b-5p, miR-198, miR-208b-3p, miR-299-5p, miR-330-5p, miR-337-5p, miR-339-5p, miR-379-5p, miR-485-5p, miR-542-3p                                                | -                                                                                                                                                                                                          |
| Chen 2016  | 59        | China   | 85          | 24   | 61   | PBMCs                | Microarray (GeneChip miRNA 3.0 Array, Affymetrix), RT-qPCR (SYBR Green) | RNU6                               | -                     | miR-451, miR-3935                                                                                                                                                    | -                                                                                                                                                                                                          |
| Chen 2017  | 45        | China   | 339         | 169  | 170  | Plasma               | Microarray (miRCURY LNA array v.18, Exiqon), RT-qPCR                    | miR-191-5p                         | miR-4639-5p           | -                                                                                                                                                                    | miR-4639-5p (0.94)                                                                                                                                                                                         |
| Chen 2018  | 60        | China   | 50          | 25   | 25   | Plasma               | RT-qPCR (SYBR Green, Applied Biosystems)                                | 5s rRNA                            | miR-27a-3p            | let-7a-5p, let-7f-5p, miR-21-5p, miR-30a-5p, miR-125b-5p, miR-130a-3p, miR-130b-3p, miR-142-3p, miR-185-5p, miR-200a-3p, miR-222-3p, miR-423-5p, miR-485-5p, miR-874 | let-7a-5p (0.90); let-7f-5p (0.85); miR-21-5p, (0.62); miR-27a-3p, (0.80); miR-30a-5p, (0.70); miR-125b-5p, (0.66); miR-130a-3p, (0.57); miR-130b-3p, (0.65); miR-142-3p, (0.96); miR-185-5p, (0.53); miR- |

| Study            | Reference | Country | sample size | # PD | # HC | Sample           | Method of MiRNA Detection                       | Normalizer                         | Up                                         | Down                               | AUC                                                                                         |
|------------------|-----------|---------|-------------|------|------|------------------|-------------------------------------------------|------------------------------------|--------------------------------------------|------------------------------------|---------------------------------------------------------------------------------------------|
|                  |           |         |             |      |      |                  |                                                 |                                    |                                            |                                    | 200a-3p, (0.66); miR-222-3p, (0.83); miR-423-5p, (0.66); miR-485-5p, (0.6); miR-874, (0.65) |
| Chen 2020        | 46        | China   | 60          | 30   | 30   | Saliva           | RT-qPCR (TaqMan)                                | miR-16                             | miR-874, miR-145-3p                        | -                                  | miR-874 (0.73); miR-145-3p (0.71)                                                           |
| Chen 2021        | 32        | China   | 91          | 46   | 45   | plasma           | RT-qPCR                                         | cel-miR-54-5p, hsa-miR-25-3p       | miR-133b, miR-221-3p                       | -                                  | miR-133b (0.84); miR-221-3p (0.64); miR-133b, miR-221-3p (0.85)                             |
| Chis 2021        | 132       | Romania | 95          | 66   | 29   | plasma           | RT-qPCR (TaqMan)                                | miR-15b, miR-17, cel-miR-39        | miR-16, miR-19a, miR-19b, miR-92a, miR-195 | -                                  | -                                                                                           |
| Chiu 2019        | 126       | Taiwan  | 100         | 50   | 50   | Serum            | RT-qPCR (Qiagen)                                | U6 snRNA                           | miR-204-5p                                 | miR-26a-5p, miR-138-5p, miR-218-5p | -                                                                                           |
| Cho 2013         | 88        | USA     | 26          | 15   | 11   | Brain (SN)       | RT-qPCR (miRCURY SYBR Green, Exiqon and Qiagen) | U6 snRNA                           | -                                          | miR-205-5p                         | -                                                                                           |
|                  |           |         | 9           | 5    | 4    | Brain (striatum) |                                                 |                                    |                                            | miR-205-5p                         | -                                                                                           |
| Cosín-Tomás 2017 | 97        | Spain   | 41          | 20   | 21   | Plasma           | RT-qPCR (TaqMan)                                | miR-17-5p, miR-106a-5p, cel-miR-39 | miR-15b-5p, miR-142-3p                     | -                                  | -                                                                                           |
| Cressatti 2020   | 47        | Canada  | 166         | 84   | 82   | Saliva           | RT-qPCR (SensiFast SYBR Lo-ROX, Frogga Bio)     | U44 snRNA                          | -                                          | miR-153, miR-223-5p                | miR-153 (0.79); miR-223-5p (0.74)                                                           |

| Study                   | Reference | Country | sample size | # PD | # HC | Sample       | Method of MiRNA Detection      | Normalizer             | Up         | Down                                             | AUC                                                                                                                                                               |
|-------------------------|-----------|---------|-------------|------|------|--------------|--------------------------------|------------------------|------------|--------------------------------------------------|-------------------------------------------------------------------------------------------------------------------------------------------------------------------|
| Ding 2016               | 33        | China   | 116         | 61   | 55   | Serum        | NGS (Solexa), RT-qPCR (TaqMan) | let-7d, let-7g, let-7i | miR-195-5p | miR-15b-5p, miR-181a-5p, miR-185-5p, miR-221-3p  | miR-15b-5p (0.9); miR-181a-5p (0.82); miR-185-5p (0.82); miR-195-5p (0.75); miR-221-3p (0.85); miR-15b-5p, miR-181a-5p, miR-185-5p, miR-195-5p, miR-221-3p (0.92) |
| Dong 2016               | 34        | China   | 166         | 92   | 74   | Serum        | NGS (Solexa), RT-qPCR (TaqMan) | Serum volume           | -          | miR-141-3p, miR-146b-5p, miR-193a-3p, miR-214-3p | miR-141 (0.85); miR-214 (0.89); miR-146b-5p (0.86); miR-193a-3p (0.82); combined (0.84)                                                                           |
| Dos Santos 2018         | 35        | Germany | 80          | 40   | 40   | CSF exosomes | NGS                            | DESeq2                 | -          | -                                                | let-7f-5p, miR-27a-3p, miR-125a-5p, miR-151a-3p, miR-423-5p (0.82)                                                                                                |
| Fazeli 2020             | 36        | Iran    | 44          | 30   | 14   | PBMCs        | RT-qPCR (SYBR Green)           | -                      | miR-27b-3p | miR-27a-3p                                       | miR-27a-3p (0.89), miR-27b-3p (0.67), miR-27a-3p/miR-27b-3p (0.81)                                                                                                |
| Fernández-Santiago 2015 | 98        | Spain   | 36          | 8    | 28   | Serum        | RT-qPCR (TaqMan)               | miR-17-5p, miR-106     | -          | miR-19b-3p, miR-29c-3p                           | -                                                                                                                                                                 |
| Fu 2017                 | 9         | China   | 30          | 15   | 15   | PBMCs        | RT-qPCR (TaqMan)               | U6 snRNA               | miR-21-5p  | -                                                | -                                                                                                                                                                 |

| Study       | Reference | Country | sample size | # PD                                  | # HC | Sample       | Method of MiRNA Detection | Normalizer                            | Up                                                                                        | Down                                                     | AUC                                                                                                                                                                                                       |
|-------------|-----------|---------|-------------|---------------------------------------|------|--------------|---------------------------|---------------------------------------|-------------------------------------------------------------------------------------------|----------------------------------------------------------|-----------------------------------------------------------------------------------------------------------------------------------------------------------------------------------------------------------|
| Ghit 2022   | 128       | Egypt   | 35          | 20                                    | 15   | Serum        | RT-qPCR (SYBR Green)      | miRNeasy Serum/Plasma SpikeIn control | -                                                                                         | miR-214, miR-221, miR-141                                | -                                                                                                                                                                                                         |
| Gong 2022   | 61        | China   | 10          | 5                                     | 5    | Midbrain     | RT-qPCR (SYBR Green)      | U6 snRNA                              | miR-132-3p                                                                                | -                                                        | -                                                                                                                                                                                                         |
| Grossi 2021 | 104       | Italy   | 29          | 15                                    | 14   | Plasma SEV   | RT-qPCR (TaqMan)          | cel-miR-39, has-miR-23b-3p            | miR-34a-5p                                                                                | -                                                        | miR-34-5p (0.74)                                                                                                                                                                                          |
| Gui 2015    | 62        | China   | 113         | 78                                    | 35   | CSF exosomes | TLDA, RT-qPCR (TaqMan)    | U6 snRNA                              | miR-10a-5p, miR-153-3p, miR-409-3p, let-7g-3p, miR-433, miR-136-3p                        | miR-1-3p, miR-19b-3p                                     | miR-1-3p (0.92); miR-10a-5p (0.90); miR-19b-3p (0.71); miR-153-5p (0.78); miR-409-3p (0.97)                                                                                                               |
| Han 2020    | 63        | China   | 79          | 39                                    | 40   | Serum        | RT-qPCR                   | miRNeasy Serum Spike-In Control       | -                                                                                         | -                                                        | -                                                                                                                                                                                                         |
| He 2021     | 64        | China   | 50          | 7 stage II; 12 stage III; 11 stage IV | 10   | Serum EV     | RT-qPCR (SYBR Green)      | U6 snRNA                              | miR-374a-5p, miR-374b-5p; stage II, III and IV; miR-28-5p, stage III; miR-22-5p, stage IV | miR-199a-3p, miR-195-5p; stage II; miR-151a-5p, stage IV | miR-374a-5p (0.76, 0.78, 0.76), miR-374b-5p (0.80, 0.74, 0.76); stage II, III and IV; miR-28-5p (0.79); stage III; miR-22-5p (0.70); stage IV; miR-199a-3p (0.74); stage II; miR-151a-5p (0.71); stage IV |

| Study     | Reference | Country | sample size | # PD | # HC | Sample                                    | Method of MiRNA Detection | Normalizer | Up                                                                                                                                                                                                                                                                                                                                                                                                                                                                                                                                                                                                                                                                                                                                                     | Down                                                                                                                                                                                                                                                                                                                                                                                                                                                                                                                                                                                                                                                                                                                                                                                                 | AUC |
|-----------|-----------|---------|-------------|------|------|-------------------------------------------|---------------------------|------------|--------------------------------------------------------------------------------------------------------------------------------------------------------------------------------------------------------------------------------------------------------------------------------------------------------------------------------------------------------------------------------------------------------------------------------------------------------------------------------------------------------------------------------------------------------------------------------------------------------------------------------------------------------------------------------------------------------------------------------------------------------|------------------------------------------------------------------------------------------------------------------------------------------------------------------------------------------------------------------------------------------------------------------------------------------------------------------------------------------------------------------------------------------------------------------------------------------------------------------------------------------------------------------------------------------------------------------------------------------------------------------------------------------------------------------------------------------------------------------------------------------------------------------------------------------------------|-----|
| Hoss 2016 | 4         | USA     | 62          | 29   | 33   | Brain (prefrontal cortex Brodmann Area 9) | NGS (Illumina HiSeq 2000) | DESeq2     | miR-15a-5p, miR-15b-5p, miR-16-3p, miR-16-5p, miR-17-3p, miR-29a-3p, miR-92b-3p, miR-95-3p, miR-106a-5p, miR-130b-5p, miR-142-5p, miR-144-3p, miR-144-5p, miR-148b-5p, miR-151b, miR-181d-3p, miR-208b-3p, miR-210-5p, miR-216b-5p, miR-330-5p, miR-340-3p, miR-361-5p, miR-363-3p, miR-369-5p, miR-376c-5p, miR-380-3p, miR-381-3p, miR-383-5p, miR-411-5p, miR-421, miR-423-3p, miR-424-3p, miR-450a-5p, miR-487a-3p, miR-516a-5p, miR-516b-5p, miR-519a-3p, miR-522-3p, miR-539-3p, miR-545-5p, miR-548o-3p, miR-576-5p, miR-589-5p, miR-628-3p, miR-628-5p, miR-654-3p, miR-656-3p, miR-874-5p, miR-1306-3p, miR-1468-5p, miR-3117-3p, miR-3127-5p, miR-3660, miR-3909, miR-3912-3p, miR-4443, miR-4526, miR-5100, miR-5690, miR-5701, miR-6841-5p | miR-10b-5p, miR-26a-1-3p, miR-29b-2-5p, miR-29c-5p, miR-30a-3p, miR-30c-2-3p, miR-103a-2-5p, miR-124-5p, miR-127-3p, miR-129-1-3p, miR-129-2-3p, miR-129-5p, miR-132-3p, miR-132-5p, miR-134-5p, miR-138-2-3p, miR-145-5p, miR-148b-3p, miR-152-3p, miR-154-5p, miR-184, miR-185-3p, miR-212-3p, miR-212-5p, miR-217, miR-320b, miR-323a-5p, miR-328-3p, miR-329-3p, miR-331-3p, miR-338-5p, miR-362-5p, miR-376c-3p, miR-377-5p, miR-378c, miR-380-5p, miR-382-3p, miR-382-5p, miR-425-3p, miR-432-5p, miR-433-3p, miR-490-5p, miR-491-5p, miR-501-5p, miR-548w, miR-655-3p, miR-670-3p, miR-671-5p, miR-937-3p, miR-1224-5p, miR-1262, miR-1294, miR-2277-3p, miR-3200-3p, miR-3928-3p, miR-3943, miR-4705, miR-4787-3p, miR-6511a-5p, miR-6810-3p, miR-6864-5p, miR-6865-3p, let-7i-3p, let-7i-5p | -   |

| Study      | Reference | Country | sample size | # PD | # HC | Sample           | Method of MiRNA Detection                  | Normalizer           | Up                           | Down                                            | AUC                                                                                      |
|------------|-----------|---------|-------------|------|------|------------------|--------------------------------------------|----------------------|------------------------------|-------------------------------------------------|------------------------------------------------------------------------------------------|
| Jiang 2021 | 37        | China   | 80          | 50   | 30   | Saliva           | Agilent Human miRNA Microarray, RT-qPCR    | U6 snRNA             | miR-6756-5p                  | miR-29a-3p, miR-29c-3p                          | miR-29a-3p (0.69); miR-29c-3p (0.72); miR-6756-5p (0.64); miR-29a-3p + miR-29c-3p (0.77) |
| Jin 2018   | 10        | China   | 92          | 46   | 46   | Serum            | RT-qPCR (TaqMan)                           | U6 snRNA             | miR-520d-5p                  | -                                               | -                                                                                        |
| Khoo 2012  | 48        | USA     | 72          | 42   | 30   | Plasma           | Microarray (Agilent v.3), RT-qPCR (TaqMan) | miR-16, ath-miR-156a | miR-626, miR-505-3p, miR-222 | -                                               | miR-626 (0.93); miR-505-3p (0.89); miR-222 (0.79)                                        |
| Kim 2007   | 89        | USA     | 6           | 3    | 3    | Brain (midbrain) | RT-qPCR (Qiagen)                           | -                    | -                            | miR-133b                                        | -                                                                                        |
| Kurz 2021  | 112       | Germany | 30          | 13   | 17   | sigmoid colon    | NGS (Illumina High-Throughput Sequencing)  | DESeq2               | miR-486-5p                   | -                                               | miR-486-5p (0.73)                                                                        |
| Li 2017    | 49        | China   | 120         | 60   | 60   | Plasma           | RT-qPCR (Mir-X SYBR Kit, TaKaRa)           | U6 snRNA             | miR-137                      | miR-124-3p                                      | miR-137 (0.71); miR-124 (0.71)                                                           |
| Li 2020    | 50        | China   | 140         | 80   | 60   | Serum            | RT-qPCR (SYBR Green)                       | U6 snRNA             | -                            | miR-150-5p                                      | miR-150-5p (0.88)                                                                        |
| Li 2021    | 51        | China   | 90          | 69   | 21   | Serum            | RT-qPCR (SYBR Green)                       | External reference   | miR-31 (aPD); miR-214 (pPD)  | -                                               | miR-31 (aPD=0.74); miR-214 (pPD=0.76)                                                    |
| Lin 2022   | 65        | China   | 158         | 92   | 64   | Serum            | RT-qPCR (SYBR Green)                       | U6 snRNA             | miR-485-3p                   | -                                               | miR-485-3p (0.92)                                                                        |
| Ma 2016    | 66        | China   | 250         | 138  | 112  | Serum            | RT-qPCR (TaqMan)                           | let-7d/g/i           | -                            | miR-29c-3p, miR-146a-5p, miR-214-3p, miR-221-3p | miR-221-3p (0.79); miR-29c-3p (0.67); miR-146a-5p (0.66); miR-214-3p (0.79)              |
| Manna 2021 | 38        | Italy   | 84          | 40   | 39   | Serum exosomes   | RT-qPCR (TaqMan)                           | global median        | miR-22-3p, miR-223-5p        | miR-21-3p                                       | miR-22-3p, miR-223-5p, miR-21-3p (0.75)                                                  |



| Study               | Reference | Country         | sample size | # PD | # HC | Sample                                           | Method of MiRNA Detection                                                  | Normalizer          | Up                                                                  | Down                                                                             | AUC                                                                                                       |
|---------------------|-----------|-----------------|-------------|------|------|--------------------------------------------------|----------------------------------------------------------------------------|---------------------|---------------------------------------------------------------------|----------------------------------------------------------------------------------|-----------------------------------------------------------------------------------------------------------|
| Margis 2011         | 8         | Brazil          | 16          | 8    | 8    | Whole blood                                      | Microarray, RT-qPCR (SYBR Green)                                           | -                   | -                                                                   | miR-1-3p, miR-29a-3p                                                             | -                                                                                                         |
|                     |           |                 | 15          | 7    | 8    |                                                  |                                                                            | -                   | miR-16-2-3p, miR-26a-2-3p                                           | -                                                                                | -                                                                                                         |
| Marques 2017        | 39        | The Netherlands | 56          | 28   | 28   | CSF                                              | RT-qPCR (TaqMan)                                                           | miR-16-5p, U6 snRNA | miR-205-5p                                                          | miR-24-3p                                                                        | miR-205-5p (0.73); miR-24-3p (0.71); miR-19a, miR-19b, miR-24, miR-30c, miR-34b, miR-133b, miR-205 (0.96) |
| Martins 2011        | 121       | Portugal        | 32          | 19   | 13   | PBMCs                                            | Microarray (miRCURY LNA array v.10, Exiqon), RT-qPCR (TaqMan)              | miR-103             | miR-15b-5p, miR-550                                                 | miR-32-5p, miR-101-3p, miR-126-5p                                                | -                                                                                                         |
| McMillan 2017       | 127       | UK              | 11          | 6    | 5    | Brain (SN)                                       | RT-qPCR (TaqMan)                                                           | U6, U58 snRNA       | -                                                                   | miR-7-5p                                                                         | -                                                                                                         |
| Miñones-Moyano 2011 | 99        | Spain           | 44          | 16   | 28   | Brain (amygdala, SN, frontal cortex, cerebellum) | Microarray (miRCURY LNA array, Exiqon), RT-qPCR (TaqMan)                   | U6 snRNA            | -                                                                   | miR-34b-3p, miR-34c-5p                                                           | -                                                                                                         |
| Mo 2017             | 53        | China           | 86          | 44   | 42   | CSF                                              | RT-qPCR (TaqMan)                                                           | U6 snRNA            | miR-144-5p, miR-200a-3p, miR-542-3p                                 | -                                                                                | miR-144-5p (0.73); miR-200a-3p (0.75); miR-542-3p (0.87)                                                  |
| Nair 2016           | 90        | USA             | 24          | 12   | 12   | Brain (putamen)                                  | miRNA assay (nCounter Human v2, Nanostring Technologies), RT-qPCR (TaqMan) | Global mean         | miR-95-3p, miR-204-5p, miR-221-3p, miR-425-5p, miR-485-3p, miR-3195 | miR-155-5p, miR-219-2-3p, miR-382-5p, miR-421, miR-423-5p, miR-3200-3p, miR-4421 | -                                                                                                         |

| Study              | Reference | Country        | sample size | # PD | # HC | Sample          | Method of MiRNA Detection                                                | Normalizer                    | Up                                                                             | Down                                                                                                                                               | AUC                                                                                                                                        |
|--------------------|-----------|----------------|-------------|------|------|-----------------|--------------------------------------------------------------------------|-------------------------------|--------------------------------------------------------------------------------|----------------------------------------------------------------------------------------------------------------------------------------------------|--------------------------------------------------------------------------------------------------------------------------------------------|
| Nie 2020           | 67        | China          | 41          | 7    | 34   | Plasma exosomes | NGS (BGISEQ-500)                                                         | DESeq2                        | miR-378g, miR-652-3p, miR-3184-3p, miR-4732-3p, miR-6131, let-7e-5p, let-7i-5p | miR-30d-5p, miR-93-5p, miR-99b-5p, miR-122-3p, miR-192-5p, miR-197-3p, miR-211-5p, miR-375, miR-425-5p, miR-576-5p, miR-941 miR-1468-5p, let-7e-3p | -                                                                                                                                          |
| Oliveira 2020      | 122       | Portugal       | 80          | 40   | 40   | Serum           | RT-qPCR (TaqMan)                                                         | cel-miR-39-3p                 | -                                                                              | miR-146a, miR-335-3p, miR-335-5p                                                                                                                   | miR-146a (0.68), miR-335-3p (0.70), miR-335-5p (0.66); combined all 3 miRNAs (0.72)                                                        |
| Ozdilek 2020       | 54        | Turkey         | 71          | 51   | 20   | Serum           | RT-qPCR (SYBR Green)                                                     | miR-191, miR-1228, cel-miR-39 | miR-29c-3p                                                                     | -                                                                                                                                                  | miR-29c -3p (0.69)                                                                                                                         |
| Patil 2019         | 91        | USA/<br>Norway | 64          | 42   | 22   | Serum           | Microarray (Affimetrix GeneChip miRNA 4.0), RT-qPCR (Quanta Biosciences) | scaRNA17, cel-miR-39-3p       | miR-335-5p, miR-3613-3p, miR-6865-3p                                           |                                                                                                                                                    | miR-335-5p/miR-3613-3p (0.75), miR-3613-3p/miR-6865-3p (0.75), miR-335-5p/miR-6865-3p (0.71) and miR-335-5p/miR-3613-3p/miR-6865-3p (0.76) |
| Perez-Soriano 2020 | 100       | Spain          | 38          | 18   | 20   | Serum           | RT-qPCR (TaqMan)                                                         | miR-320a-3p, miR-6727-5p      | -                                                                              | -                                                                                                                                                  | -                                                                                                                                          |
| Qin 2019           | 68        | China          | 44          | 20   | 24   | CSF             | RT-qPCR (TaqMan)                                                         | miR-24                        | -                                                                              | miR-626                                                                                                                                            | -                                                                                                                                          |

| Study                | Reference | Country | sample size | # PD | # HC | Sample                                            | Method of MiRNA Detection | Normalizer                                                             | Up                                                         | Down                    | AUC                                                                                    |
|----------------------|-----------|---------|-------------|------|------|---------------------------------------------------|---------------------------|------------------------------------------------------------------------|------------------------------------------------------------|-------------------------|----------------------------------------------------------------------------------------|
| Ravanidis 2019; 2020 | 41        | Greece  | 401         | 208  | 193  | Plasma                                            | RT-qPCR (SYBR)            | miR-103a-3p, miR-16-5p, miR-191-5p, miR-223-3p, miR-425-5p, miR-423-3p | miR-22-3p, miR-124-3p, miR-136-3p, miR-154-5p, miR-323a-3p | -                       | Pooled study (0.74); miR-7-5p, miR-136-3p, miR-409-3p                                  |
| Schlaudraff 2014     | 113       | Germany | 13          | 5    | 8    | Brain (midbrain)                                  | RT-qPCR (Qiagen)          | $\beta$ -actin, TIF-1A, ENO2                                           | -                                                          | miR-133b                | -                                                                                      |
| Schwienbacher 2017   | 105       | Italy   | 198         | 100  | 98   | Plasma, WBC                                       | RT-qPCR (TaqMan)          | cel-miR-39-3p, cel-miR-54-3p, cel-miR-238-3p                           | -                                                          | -                       | -                                                                                      |
|                      |           |         | 20          | 10   | 10   |                                                   |                           | -                                                                      | -                                                          | -                       |                                                                                        |
| Serafin 2015         | 106       | Italy   | 72          | 36   | 36   | PBMCs                                             | RT-qPCR (TaqMan)          | miR-103a-3p, U6 snRNA, Z30, RNU24 snoRNAs                              | miR-29a-3p, miR-30b-5p, miR-103a-3p                        | -                       | -                                                                                      |
| Sethi 2009           | 92        | USA     | 10          | 4    | 6    | Brain (temporal lobe neocortex Brodmann Area A22) | Microarray (LC Sciences)  | 5S RNA                                                                 | -                                                          | -                       | -                                                                                      |
| Sheinerman 2017      | 42        | USA     | 100         | 50   | 50   | Plasma                                            | RT-qPCR (TaqMan)          | miR-16, miR-27a                                                        | -                                                          | -                       | miR-9-3p/miR-129-3p (0.91); miR-127-3p/miR-411-5p (0.81); miR-491-5p/miR-138-5p (0.81) |
| Shu 2020             | 69        | China   | 126         | 82   | 44   | Serum                                             | RT-qPCR                   | U6 snRNA                                                               | -                                                          | miR-132-3p, miR-146a-5p | miR-132-3p (0.73); miR-146a-5p (0.73)                                                  |

| Study          | Reference | Country  | sample size | # PD | # HC | Sample                      | Method of MiRNA Detection                                               | Normalizer                      | Up                                                                                                              | Down                                                         | AUC                                       |
|----------------|-----------|----------|-------------|------|------|-----------------------------|-------------------------------------------------------------------------|---------------------------------|-----------------------------------------------------------------------------------------------------------------|--------------------------------------------------------------|-------------------------------------------|
| Soreq 2013     | 56        | Israel   | 13          | 7    | 6    | Peripheral blood leukocytes | NGS (SOLid system V3.5, Applied Biosystems)                             | Quantile normalization          | miR-18b-3p, miR-21-5p, miR-20a-5p, miR-150-5p, miR-199b-5p, miR-378c, miR-671-5p, miR-1249, miR-1274b, miR-4293 | miR-16-5p, miR-92b-3p, miR-320a, miR-320b, miR-320c, miR-769 | -                                         |
| Starhof 2018   | 125       | Denmark  | 60          | 37   | 23   | CSF                         | Microarray (miRCURY v.4, Exiqon), RT-qPCR (TaqMan)                      | Global mean                     | miR-7-5p, miR-34c-3p, miR-106b-5p, miR-184, miR-218-5p, miR-331-5p                                              | miR-99a-5p, let-7b-5p                                        | miR-7-5p + miR-331-5p + miR-145-5p (0.88) |
|                |           |          |             |      |      | Plasma                      |                                                                         |                                 | miR-30c-5p, miR-191-5p, miR-218-5p, miR-873-3p                                                                  | miR-574-3p                                                   | -                                         |
| Su 2019        | 70        | China    | 56          | 28   | 28   | CSF                         | RT-qPCR (Ribo Bio)                                                      | U6 snRNA                        | -                                                                                                               | miR-26a-5p                                                   | -                                         |
| Sulaiman 2020  | 129       | Malaysia | 39          | 28   | 11   | Plasma                      | Affymetrix GeneChip miRNA v4.0                                          | R software via the Affy package | miR-301a-3p, miR-100-5p, miR-140-5p, miR-486-3p, miR-143-3p                                                     | -                                                            | -                                         |
| Takahashi 2015 | 119       | Japan    | 77          | 30   | 47   | Plasma                      | miRNA oligo chip (TORAY Industries, v.17), RT-qPCR (SYBR Green, Qiagen) | miR-4516                        | miR-663b                                                                                                        | -                                                            | -                                         |

| Study       | Reference | Country | sample size | # PD | # HC | Sample                           | Method of MiRNA Detection          | Normalizer                                                 | Up                                                                                                                                                                                                                                            | Down                                                          | AUC                                                        |
|-------------|-----------|---------|-------------|------|------|----------------------------------|------------------------------------|------------------------------------------------------------|-----------------------------------------------------------------------------------------------------------------------------------------------------------------------------------------------------------------------------------------------|---------------------------------------------------------------|------------------------------------------------------------|
| Tan 2022    | 71        | China   | 11          | 7    | 4    | CSF                              | NGS (Hiseq2500)                    | DESeq2                                                     | miR-486-5p, miR-122-5p, miR-451a, miR-423-5p, let-7b-5p, miR-151a-3p, miR-320a, miR-574-5p, miR-206, miR-204-5p, miR-1298-5p, miR-320b, miR-1246, miR-1307-3p, miR-128-3p, miR-409-3p, let-7a-5p, miR-144-3p, let-7d-3p, miR-4508, miR-155-5p | -                                                             | -                                                          |
| Tatura 2016 | 114       | Germany | 32          | 22   | 10   | Brain (anterior cingulate gyrus) | TLDA, RT-qPCR (SYBR Green)         | U6 snRNA                                                   | miR-144-3p, miR-199b-5p, miR-221-3p, miR-488-3p, miR-544                                                                                                                                                                                      | -                                                             | -                                                          |
| Thomas 2012 | 93        | USA     | 16          | 8    | 8    | Brain (frontal cortex)           | Microarray (Agilent)               | -                                                          | miR-144-3p, miR-148a-3p, miR-190, miR-195-3p, miR-199a-3p, miR-200a-3p, miR-200a-5p, miR-200b-5p, miR-424-3p, miR-429, miR-451                                                                                                                | -                                                             | -                                                          |
| Tolosa 2018 | 101       | Spain   | 10          | 6    | 4    | iPSC-derived DA neurons          | TLDA, RT-qPCR (TaqMan, SYBR Green) | U6 snRNA, RNU48 snoRNA, miR-26a, miR-484, miR-744, miR-26b | miR-9-5p, miR-135a-5p, miR-135b-5p, miR-449a, miR-449b-5p                                                                                                                                                                                     | miR-141-3p, miR-199a-5p, miR-299-5p, miR-518e-3p, miR-519a-3p | -                                                          |
| Tong 2022   | 72        | China   | 259         | 209  | 50   | Serum exosomes                   | TLDA, RT-qPCR (TaqMan)             | RNU6-B                                                     | miR-151a-5p, miR-24, miR-485-5p, miR-331-5p, miR-214                                                                                                                                                                                          | -                                                             | miR-151a-5p (0.86); miR-24 (0.88); miR-331-5p (0.88); miR- |

| Study                       | Reference  | Country | sample size | # PD | # HC | Sample                               | Method of MiRNA Detection                                      | Normalizer                                         | Up                                | Down                               | AUC                                             |
|-----------------------------|------------|---------|-------------|------|------|--------------------------------------|----------------------------------------------------------------|----------------------------------------------------|-----------------------------------|------------------------------------|-------------------------------------------------|
|                             |            |         |             |      |      | CSF exosomes                         |                                                                |                                                    |                                   |                                    | 485-5p (0.90)<br>; miR-214 (0.93)               |
| <b>Uwatoko 2019</b>         | <b>120</b> | Japan   | 56          | 28   | 28   | Plasma                               | Microarray (RT-qPCR (SYBR Green, Qiagen)                       | Global mean (microarray); miR-4516 (RT-qPCR)       | miR-19b-3p                        | miR-671-5p                         | -                                               |
| <b>Vallelunga 2014</b>      | <b>107</b> | Italy   | 50          | 25   | 25   | Serum                                | TLDA, RT-qPCR (TaqMan)                                         | Global mean (TLDA)<br>miR-17, miR-151-3p (RT-qPCR) | miR-24-3p, miR-223-5p, miR-324-3p | miR-30c-5p, miR-148b-3p            | -                                               |
| <b>Vallelunga 2019</b>      | <b>108</b> | Italy   | 106         | 56   | 50   | Serum                                | RT-qPCR (miRCURY LNA assay, Exiqon)                            | miR-93-5p                                          | miR-30c-5p                        | -                                  | -                                               |
| <b>Vallelunga 2021</b>      | <b>109</b> | Italy   | 107         | 51   | 56   | Serum                                | RT-qPCR (Exiqon)                                               | miR-93-5p                                          | -                                 | miR-96-5p                          | miR-96-5p (0.64)                                |
| <b>Villar-Menéndez 2014</b> | <b>102</b> | Spain   | 34          | 25   | 9    | Brain (putamen)                      | RT-qPCR (Exiqon)                                               | RD38B snoRNA                                       | -                                 | miR-34b-3p                         | -                                               |
| <b>Wake 2016</b>            | <b>57</b>  | USA     | 65          | 29   | 36   | Brain (prefrontal cortex Brodmann 9) | NGS (Illumina HiSeq 2000), RT-qPCR (miRCURY LNA assay, Exiqon) | -                                                  | -                                 | -                                  | -                                               |
| <b>Wang 2020</b>            | <b>73</b>  | China   | 240         | 120  | 120  | Plasma                               | RT-PCR (SYBR Green)                                            | U6 snRNA                                           | -                                 | miR-103, miR-107                   | -                                               |
| <b>Wu 2020</b>              | <b>43</b>  | China   | 135         | 85   | 50   | Serum                                | RT-PCR (SYBR Green)                                            | U6 snRNA                                           | -                                 | miR-9a, miR-133b                   | miR-9a (0.90); miR-133b (0.89); combined (0.96) |
| <b>Xing 2020</b>            | <b>74</b>  | China   | 25          | 15   | 10   | Brain (prefrontal cortex)            | RT-qPCR (TaqMan)                                               | U6 snRNA                                           | -                                 | miR-124-3p, miR-144-3p, miR-218-5p | -                                               |

| Study        | Reference | Country | sample size | # PD | # HC | Sample           | Method of MiRNA Detection     | Normalizer                             | Up                      | Down                               | AUC                                  |
|--------------|-----------|---------|-------------|------|------|------------------|-------------------------------|----------------------------------------|-------------------------|------------------------------------|--------------------------------------|
| Yan 2020     | 75        | China   | 47          | 23   | 24   | Serum            | RT-qPCR (TaqMan)              | to the level of the external reference | miR-214                 | -                                  | miR-214 (0.71)                       |
| Yang 2018    | 76        | China   | 60          | 30   | 30   | Serum exosomes   | RT-qPCR (Sangon Biotech)      | U6 snRNA                               | miR-135a-5p             | -                                  | -                                    |
| Yang 2019 A  | 77        | China   | 592         | 319  | 273  | Plasma           | RT-qPCR (Tiangen Biotech)     | miR-16                                 | miR-105-5p              | -                                  | miR-105-5p (0.77)                    |
| Yang 2019 B  | 78        | China   | 491         | 269  | 222  | Plasma           | RT-qPCR (Tiangen Biotech)     | artificial synthetic external miRNA    | miR-132-3p              | -                                  | miR-132-3p (0.72)                    |
| Yang 2021    | 79        | China   | 156         | 78   | 78   | Peripheral blood | RT-PCR (SYBR Green)           | U6 snRNA                               | -                       | miR-34a; miR-125a                  | miR-34a (0.81); miR-125a (0.78)      |
| Yao 2018     | 80        | China   | 185         | 52   | 48   | Plasma exosomes  | RT-qPCR (SYBR Green, Exiqon)  | Endogenous control                     | miR-331-5p              | miR-505-3p                         | miR-331-5p (0.85); miR-505-3p (0.90) |
| Yilmaz 2016  | 123       | Turkey  | 204         | 102  | 102  | Whole blood      | RT-PCR (SYBR Green, Qiagen)   | miR-26b-5p                             | -                       | miR-335-3p, miR-561-3p, miR-579-3p | -                                    |
| Yousefi 2022 | 118       | Iran    | 58          | 38   | 20   | PBMCs            | RT-qPCR (SYBR Green)          | U6 snRNA                               | -                       | miR-24-3p; miR-30c-5p              | miR-24-3p (0.82); miR-30c-5p (0.71)  |
| Zago 2022    | 110       | Italy   |             |      |      | Serum            | RT-qPCR (TaqMan)              | miR-16-5p, miR-93-5p, miR-186-5p       | miR-150-5p (dnPD, adPD) | miR-144-3p (dnPD)                  | -                                    |
| Zhang 2017   | 44        | China   | 95          | 46   | 49   | Plasma           | RT-qPCR (RiboBio)             | U6 snRNA                               | -                       | miR-133b, miR-433-3p               | miR-133b, miR-433-3p (0.59)          |
| Zhang 2020   | 81        | China   | 274         | 148  | 126  | Serum            | RT-qPCR (Shanghai GenePharma) | U6 snRNA                               | miR-30c-5p, miR-373     | -                                  | -                                    |
| Zhao 2014    | 82        | China   | 92          | 46   | 46   | Serum            | RT-qPCR (TaqMan)              | U6 snRNA                               | -                       | miR-133b                           | -                                    |





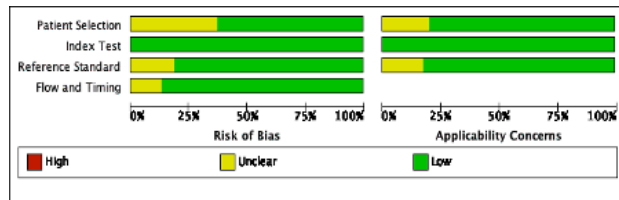

**Supplementary Figure S1. Quality of studies included in the systematic review and meta-analysis using the QUADAS-2 quality assessment tool (n=102 studies).**

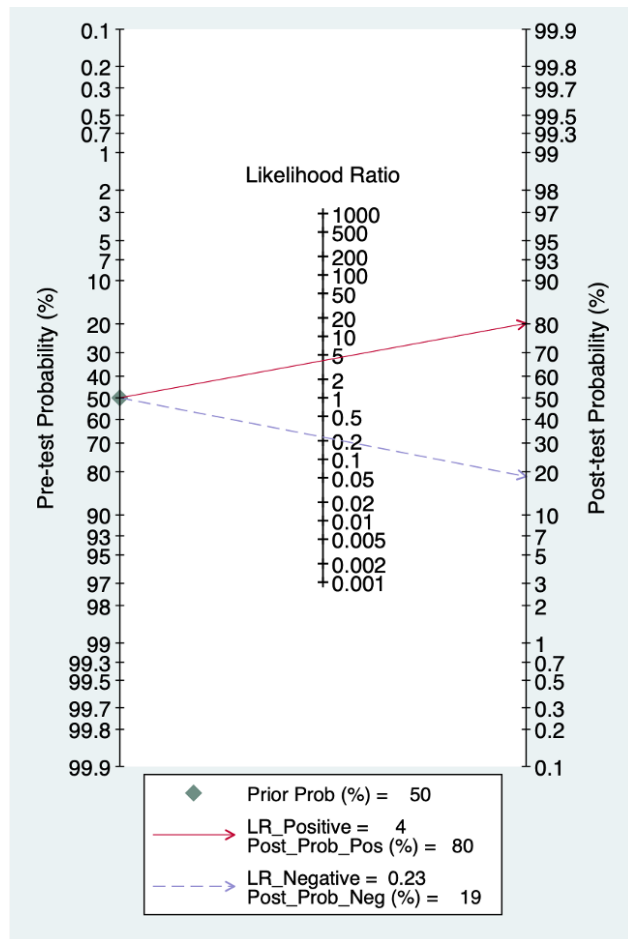

**Supplementary Figure S2. Fagan's nomogram** showing pre-test (left vertical axis) and post-test (right vertical axis) probabilities of biofluid-derived microRNAs able to discriminate between Parkinson's disease patients and controls with corresponding estimates for heterogeneity I2 tests (n=15 studies). The red arrow represents the positive likelihood ratio, and the purple dotted arrow represents the negative likelihood ratio.

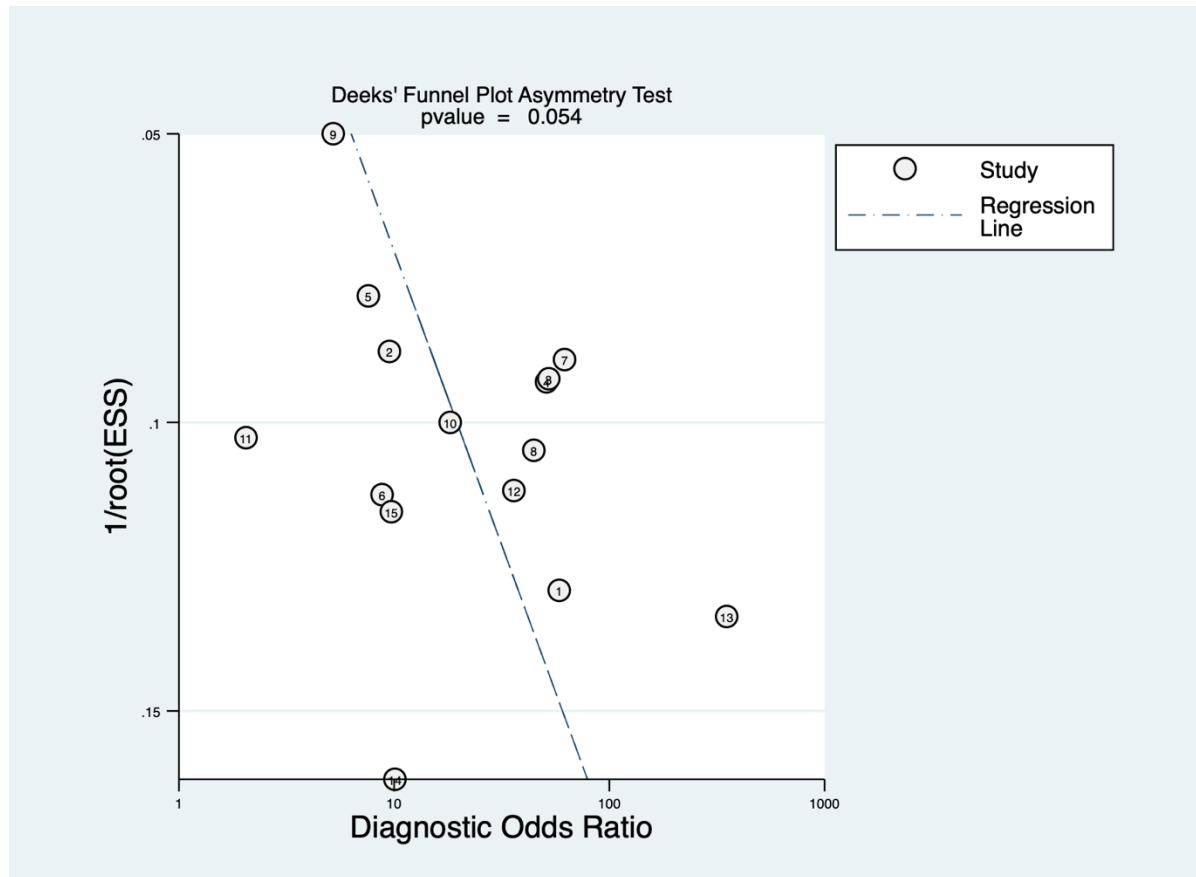

**Supplementary Figure S3. Deeks' Funnel Plot Asymmetry Test** with a superimposed regression line on a funnel plot indicating no significant publication bias in the analysis of biofluid-derived microRNAs from Parkinson's disease patients and controls (n=15 studies). The circles represent each study involved in the meta-analysis: 1= [29], 2= [30], 3= [31], 4= [33], 5= [34], 6= [38], 7= [43], 8= [32], 9= [41], 10= [42], 11= [44], 12= [35], 13= [39], 14= [36] and 15= [37].
